# Supplementary material
Source: publisher figshare collection journal article supplement (https://karger.figshare.com/ndownloader/files/25144667)
Supplement: Supplementary file 1 [file 25144667]

Supplementary data

**Table 1.** Total baseline characteristics of study patients with dementia (n = 892) and comparison with geriatric patients with no cognitive symptoms (n = 203)

| Baseline characteristics  (n) % | Dementia (n = 676) | Cognitive impairment (n = 216) | Dementia/ cognitive impairment (n = 892) | Older patients with no cognitive symptoms (n = 203) | P-value |
| --- | --- | --- | --- | --- | --- |
| ***Age:*** Mean ± SD, year | 80.1 ± 7.4 | 76.2 ± 8.6 | 78.9 ± 8.0 | 77.3 ± 7.5 | 0.01** |
| ***Sex*:** women | 67.6% | 59.2% | 65.4% | 70.0% | 0.001** |
| ***TMSE*** (mean ± SD) | 19.3 ± 6.7 | 23.8 ± 6.3 | 20.2 ± 6.8 | 24.7 ± 4.5 | 0.001** |
| ***Underlying disease*** |  |  |  |  |  |
| - Hypertension | 66.7% | 64.7% | 66.3% | 75.9% | 0.02** |
| - Hyperlipidemia | 58.4% | 57.8 % | 58.7% | 65.0% | 0.10 |
| - Diabetes | 32.7% | 29.8% | 32.0% | 32.5% | 0.99 |
| - Chronic kidney disease | 16.6% | 15.1% | 16.5% | 13.8% | 0.29 |
| - Stroke | 13.5% | 14.7% | 13.7% | 10.8% | 0.22 |
| - Cancer | 3.9% | 4.6% | 4.1% | 5.4% | 0.001** |
| - Pulmonary disease | 1.9% | 3.2% | 2.3% | 3.0% | 0.60 |
| - Osteoarthritis | 12.8% | 17.9% | 14.0% | 35.5% | 0.001** |
| - Depression | 2.8% | 11.0% | 4.7% | 8.9% | 0.05** |
| - Liver diseases | 0.9% | 0.9% | 1.0% | 1.5% | 0.53 |
| - Thyroid diseases | 5.5% | 3.7% | 4.8% | 6.4% | 0.46 |
| - Impaired fasting glucose | 9.0% | 17.0% | 10.3% | No data | 0.001** |
| - Anemia | 4.9% | 6.9% | 5.4% | 5.4% | 0.97 |
| ***Basic ADLs*** |  |  |  |  |  |
| - Totally independent | 73.6% | 92.7% | 79.1% | 77.8% |  |
| - Partially dependent | 20.0% | 6.0.% | 15.7% | 21.2% | 0.20 |
| - Totally dependent | 6.4% | 0.9% | 5.0% | 1.0% |  |
| ***Healthcare insurance (missing n = 28)*** |  |  |  |  | 0.01* |
| - **CSMBS** | 65.6% | 69.7% | 67.5% | 73.4% |  |
| - Self-insuring | 28.4% | 25.7% | 27.1% | 16.7% |  |
| - Universal Coverage | 6.0% | 3.7% | 5.2% | 9.4% |  |
| - Social Security scheme | 0.0% | 0.9% | 0.2% | 0.5% |  |
| ***Education (missing n = 44)*** |  |  |  |  | 0.001* |
| - No data | 11.7% | 6.4% | 10.6% | - |  |
| - No education | 6.0% | 4.6% | 5.9% | 5.9% |  |
| - Primary school | 41.7% | 29.8% | 37.5% | 44.3% |  |
| - Junior high school | 6.3% | 5.5% | 6.2% | 5.9% |  |
| - Secondary school | 10.7% | 12.8% | 11.8% | 8.9% |  |
| - Diploma | 5.8% | 10.1% | 7.0% | 7.9% |  |
| - Bachelor degree | 14.4% | 23.4% | 16.5% | 27.1% |  |
| - > Bachelor degree | 3.3% | 7.3% | 4.6% | 0.0% |  |
| ***Treatment (%)*** |  |  |  |  |  |
| - AChEIs | 61.2% | 6.0% | 47.2% | NA |  |
| - Memantine | 23.5% | 0.9% | 18.3% | NA |  |
| - Antidepressants | 30.4% | 12.8% | 26.3% | NA |  |
| - Antipsychotics | 26.9% | 16.5% | 25.8% | NA |  |
| - Sedatives | 2.3% | 3.2% | 2.5% | NA |  |

Tested via * Pearson chi-squared test and ** independent-sample t-test

Abbreviations: ADL, activities of daily living; AChEIs, acetylcholine esterase inhibitors; CSMBS, Civil Servant Medical Benefits Scheme; NA, not available

**Table 2** Presence and number of other geriatric syndromes in patients with and without cognitive impairment

| Presence of other geriatric syndromes | Patients with cognitive problems (n = 892) | Patients with no cognitive problems (n = 203) | P-value |
| --- | --- | --- | --- |
| Delirium | 16.4% | 0.9% | < 0.001 |
| Depression | 8% | 5.7% | 0.129 |
| Insomnia | 28% | 25.3% | 0.301 |
| Falls | 14.9% | 10.1% | 0.012 |
| Immobility | 8.8% | 5.2% | 0.010 |
| Incontinence | 48.4% | 30.9% | < 0.001 |
| Weight loss | 7.4% | 5.5% | 0.185 |
| Loss of appetite | 14.9% | 9.3% | 0.003 |
| Total number of other geriatric syndromes  - Mean (SD)  - Median (IQR) | 2.32 ± 1.19  2.0 (1,3) | 1.84 ± 1.04  2.0 (1,2) | < 0.001 |

Table 3: Healthcare insurance and proportion of PwD receiving pharmacological treatment for dementia

| Healthcare insurance | AChEIs | Memantine | Antidepressants | Antipsychotics | Sedatives | Anticonvulsants |
| --- | --- | --- | --- | --- | --- | --- |
| - CSMBS | 51.5% | 22.1% | 25.6% | 23.9% | 3.4% | 0.3% |
| - Self-insuring | 53.0% | 15.3% | 27.5% | 26.3% | 0.8% | 0.8% |
| - Universal Coverage | 77.8% | 22.2% | 24.1% | 29.6% | 1.9% | 0% |
| - Social Security Scheme | 100% | 0% | 0% | 0% | 0% | 0% |

AChEIs, acetylcholine esterase inhibitors; CSMBS, Civil Servant Medical Benefits Scheme
